# Supplementary material
Source: PubMed Central journal article supplement (PMC3430354)
Supplement: JB.00793-12_zjb999091868so1.pdf [file JB.00793-12_zjb999091868so1.pdf]

# Figure S1

## A



```

Rt      -WIASMGKRKLVESFIKYDI-DINKNKDI  YSN-LSYYSAVDN-AFRAVARNNL-----FELRALLDVY-PILQEKNS
1      --LAYFGIDQLLERFLRGKL-DINA-KDN  HGT-TALHWAVRN-GHKAMDKHGATPLHYSASNAHGTIVRVLLDKG-ANINKEER
2      -----GSTAIIIEQLISSNV-DKDI-KNN  RGE-TPLHIALQHQSSKD-----KLIPELLKALK-VNLQSKDS
3      -----IGHLVVDVGA-DKDI-TDS      SGQ-TILQYALQKINRPN-----FQKLLSALG-ININEKNR
4      -FAAKNNSKESAEELLI SYGI-NINE-KND  DGE-TAIHIAALF-NSKE-----TAEVLISHG-ANINEKND
5      HIAAKNNRKEIVEFLISHGA-NINE-KDE    DGK-TELHIAAEN-NSKA-----TAEVLISHG-ANINEKDE
6      -----KEIAEFLISHGA-NINE-KDE    DGK-TELHIAAEN-NSKA-----TAEVLISHG-ANINEKDE
7      ---AAGHMEVMEYLIQQGS-DLNK-NGN     DWG-TPLHAAISN-GHLE-----VVNVLFAEG---AQGTRF
8      -YAAERGDINVVKLLLSYDI-DINE-KDV    YGK-TPLHYAADN-IDKN-----IMELFTSKG-ANIEEKDL
9      LIASHFNHKDIVEFLFSGA-DINI-KDN     DGN-SPLHTT---SSVE-----LAEFLISHH-LDVNAKNI
10     -FAAENDNKEIAEILLHGA-NINA-KDI      YGN-TALHIAVEN-NSKE-----TAKILLLHG-ADINEKND
11     -YAAENGHRTVVKFLFLARDIMNLDSD-RDF   TGS-TPFSRAAEN-GHVA-----VVRMLLKTGRVDVNSEDS
12     --VALKGRNLIVKEFFERKDFDHNA-RNK    DGL-TILNAAIIS-GNDD-----LVYYIFDKY-PQLEWTD
13     ---QREYLKKQIVFVIENKQFDQYY-DPL    RGNVSEFAFAAFELGSSE-----ALKILYNIG-YPINIKNQ
  
```



```

Rt      TGETLLTAAIYNDNYLAKFLVIRG-IKTSVLKKDE  CKY-PLDIASSQGNTNIVCMLMKAGYN---
1      SGRALTASRAIENGSOEIVKMLLDKK-ANVNRPKQST  FIRTPLSLAAENGHGSVVKLLVE-----
2      NGYTLHLHTAILEEEDERLVSLLNST-LAVDKNAKND  FGKSPHLHIAAEKGNLRLVNLVVALK-----
3      NQQTLLHQSILEGNELAKQLIAAG-ADIQ--AKNK    QEYTPHLHAAIGGHLELVALLIAKDKAKNPN
4      NGETALHIAALNDNKETAELLISYG-IHIN--EKND   NGETPLHIAEQYNNEEIAKLLI-----
5      YGQTALHIAAYNDSKEIAEFLISHG-ANIN--EKDE   DGKTELHIAAENNSKATAEVLISHGAN----
6      YGQTALHIAAYNDSKEIAEFLISHG-ANIN--EKDE   YGQTALHIATENNSKEIAEVLIE-----
7      EGLTLLYIASRYDHVDVVKFLVSKG-CDVN--EKSE   CGKSPHAAACYTGNMNIKLLVHHKA-----
8      NGKTPHLYAVPNRDI EITEFLFSNG-ANIN--DKDK   NGKTPLLIASHFNHKDIVEFL-----
9      NGKTLHLFAATNNYKNMIEFLILHG-ANIN--EKDN   DGKIPLHYAATANKANSECLITHGANIN----
10     NQQTALHIAVDNNTKITEILLHGA-ANIN--EKDK    MEKTPQLIATENDRKKIVKLLL-----
11     EGRTPLSLAAENGHVVVVKMLLKTGRLLDID--LQDS  EARTPLSWASGNHGATVVRALLK-----
12     LGQTPPLHCAPANQYVLT EYFLGKG-ANIN--TQDS  TGRTPLHTACALGDI GLASILLNVQGIN----
13     DNETLLHAASKNRRQTQVLTALLALG-IDVN--VRSN  ENKSALYLAIEHGNVEITKLLLE-----
  
```

## B

|    | Taxon                                        | Acc. no.     | Coords. (aa) | Bit score |
|----|----------------------------------------------|--------------|--------------|-----------|
| Rt | <i>Rickettsia typhi</i> Wilmington           | YP_067182    | 485-586      | 271       |
| 1  | <i>Aspergillus flavus</i> NRRL3357           | XP_002382730 | 180-314      | 41.6      |
| 2  | Candidatus <i>Amoebophilus asiaticus</i> 5a2 | YP_001957643 | 852-967      | 40        |
| 3  | Candidatus <i>Amoebophilus asiaticus</i> 5a2 | YP_001957643 | 1167-1280    | 41.6      |
| 4  | <i>Trichomonas vaginalis</i> G3              | XP_001579637 | 31-144       | 41.2      |
| 5  | <i>Trichomonas vaginalis</i> G3              | XP_001330150 | 149-268      | 41.2      |
| 6  | <i>Trichomonas vaginalis</i> G3              | XP_001330150 | 223-330      | 38.1      |
| 7  | <i>Strongylocentrotus purpuratus</i>         | XP_001196834 | 105-218      | 40.8      |
| 8  | <i>Trichomonas vaginalis</i> G3              | XP_001307918 | 309-421      | 40.4      |
| 9  | <i>Trichomonas vaginalis</i> G3              | XP_001307918 | 407-524      | 33.5      |
| 10 | <i>Trichomonas vaginalis</i> G3              | XP_001579859 | 417-530      | 40.4      |
| 11 | <i>Penicillium marneffeii</i> ATCC 18224     | XP_002150094 | 190-307      | 40        |
| 12 | <i>Trichomonas vaginalis</i> G3              | XP_001308456 | 423-542      | 40        |
| 13 | <i>Trichomonas vaginalis</i> G3              | XP_001314500 | 1018-1133    | 37        |

**Figure S1. Structural prediction of the ankyrin repeats within RARP-1.** (A) Alignment of the Ankyrin (ANK) domain of *R. typhi* RARP-1 (NCBI accession no. YP\_067182) with ANK domains of 13 diverse proteins retrieved from a PSI-BLAST search using only residues 485-586 as a query. ANK repeats 1, 2 and 3 are boxed black, tan and red, respectively. Structural model (6) for each repeat is mapped over the alignment. (B) Information for sequences shown in A. Coordinates of PSI-BLAST subjects producing significant alignments were excised and aligned with residues 485-586 of *R. typhi* RARP-1. Alignment constructed using MUSCLE v3.6 (3) with default parameters.

Figure S2

A

|     | signal sequence                                                            | 1 | 2 | 1 |      |
|-----|----------------------------------------------------------------------------|---|---|---|------|
| Br  | MRK--LTIIFISLLLTSPVIAIDLQEALTEGYKNNNDLKTARVKFVNSIEQFPQAFSGFMPASLSVNRN      |   |   |   | (68) |
| Bo  | MRK--LTIIFISLLLTSPVIAIDLQEALTEGYKNNNDLKTARVKFVNSIEQFPQAFSGFMPASLSVNRN      |   |   |   | (68) |
| Ca  | MRK--LTTFIVITLLLTSSATSVDLQEALTEGYKNNNEELKAARIKFLNSIESFPRAFASFMPASGLQINRN   |   |   |   | (68) |
| Ty  | MSK--LTTFIVITLLLTGSAVAVDLEQALTEGYKNNNEELKAARIKFLNAIEQLPQAFSGFMPNVGLQINRQ   |   |   |   | (68) |
| Pr  | MSKFTITIFITITLLFTGSAVIALDLEQALTEGYKNNNEELKAAQIKFLNAIEQFPQAFSGFMPNVGLQINRQ  |   |   |   | (70) |
| P22 | MSKFTITIFITITLLFTGSAVIALDLEQALTEGYKNNNEELKAAQIKFLNAIEQFPQAFSGFMPNVGLQINRQ  |   |   |   | (70) |
| Ak  | MRK--LTTFIVITLLLTGSAVAVDLEQALTEGYKNNNEELKAARIKFLNAIEQFPQAFSGFMPASGLQINRQ   |   |   |   | (68) |
| Fe  | MRK--LTTFIVITLLLTGSAVAVDLEQALTEGYKNNNEELKAARIKFLNAIEQFPQAFSGFMPASGAMKIERS  |   |   |   | (68) |
| IS  | MRK--LTTFIVITLLLTSLVAAVDLEQALTEGYKNNNEELKAARIKFLDSIEQFPRAFSGFMPASGAMKIERS  |   |   |   | (68) |
| Ma  | MCK--LTTFIVITLLLTSSVAAVDLQEALTEGYKNNNEELKAARIKFLGSIEQFPRAFSGFMPASGLQINRQ   |   |   |   | (68) |
| Pe  | MRK--LTTFIVITLLLTSSVAAVDLQGGALTEGYKNNNEELKAARIKFLDSIEQFPRAFSGFMPASGLQINRQ  |   |   |   | (68) |
| Ri  | MRK--LITFIVITLLLTSSVAAVDLQGGALTEGYKNNNEELKAARIKFLDSIEQFPRAFSGFMPASVGLQINRQ |   |   |   | (68) |
| Rw  | MRK--LITFIVITLLLTSSVAAVDLQGGALTEGYKNNNEELKAARIKFLDSIEQFPRAFSGFMPASVGLQINRQ |   |   |   | (68) |
| Hj  | MRK--FTTFIVITLLLTSSVAAVDLQGGALTEGYKNNNEELKAARIKFLDSIEQFPRAFSGFMPASGLQINRQ  |   |   |   | (68) |
| Ja  | MRK--LTTFIVITLLLTSSVAAVDLQGGALTEGYKNNNEELKAARIKFLDSIEQFPRAFSGFMPASGLQINRQ  |   |   |   | (68) |
| Co  | MRK--LITFIVITLLLTSSVAAVDLQGGALTEGYKNNNEELKAARIKFLDSMEQFPRAFSGFMPASGLQINRQ  |   |   |   | (68) |
| Si  | MRK--LITFIVITLLLTSSVAAVDLQGGALTEGYKNNNEELKAARIKFLDSIEQFPRAFSGFMPASVGLQINRQ |   |   |   | (68) |
| Af  | MRK--LITFIVITLLLTSSVAAVDLQGGALTEGYKNNNEELKAARIKFLDSIEQFPRAFSGFMPASGLQINRQ  |   |   |   | (68) |

|     | 1                                                                         | 2 | 3 |       |
|-----|---------------------------------------------------------------------------|---|---|-------|
| Br  | NSKTKYTNKRYAQLAGNPPEIDNNQGGALTIQQSLFNGGSDVAALRSAQAARFRASRGQYYSSSEQVLLDLI  |   |   | (138) |
| Bo  | NSKTKYTNKRYAQLAGNPPEIDNNQGGALTIQQSLFNGGSDVAALRSAQAARFRASRGQYYSSSEQVLLDLI  |   |   | (138) |
| Ca  | NTKNKYNKRYAGLILRETDSDQGGALTIQQSLFNGGSSVAALKAAQAGFRASRGQYYSSSEQVLLDLI      |   |   | (138) |
| Ty  | NSKTRYNKRYANRGLGITSRDTSDQGGALTIQQSLFNGGSSVAALKAAQAGFRASRGQYYSSSEQVLLDLI   |   |   | (138) |
| Pr  | NSKTKYTNKRYVNRGLGITPRETASTQGGALTIQQSLFNGGSSVAALKAAQAGFRASRGQYYSSSEQVLLDLI |   |   | (140) |
| P22 | NSKTKYTNKRYVNRGLGITPRETASTQGGALTIQQSLFNGGSSVAALKAAQAGFRASRGQYYSSSEQVLLDLI |   |   | (140) |
| Ak  | NSKTKYTNKRYTDKGLTTRQTDSDQGGALTIQQSLFNGGSSVAALKAAQAGFRASRGQYYSSSEQVLLDLI   |   |   | (138) |
| Fe  | NSKTKYTNKRYTDKGLTTRQTDSDQGGALTIQQSLFNGGSSVAALKAAQAGFRASRGQYYSSSEQVLLDLI   |   |   | (138) |
| IS  | NSKTKYTNKRYADRLGLTPRETSDQGGALTIQQSLFNGGSSVAALKAAQAGFRASRGQYYSSSEQVLLDLI   |   |   | (138) |
| Ma  | NNKTKYTNKRYADRLGLTPRETSDQGGALTIQQSLFNGGSSVAALKAAQAGFRASRGQYYSSSEQVLLDLI   |   |   | (138) |
| Pe  | HNKTKYTNKRYADRLGLTPRETSDQGGALTIQQSLFNGGSSVAALKAAQAGFRASRGQYYSSSEQVLLDLI   |   |   | (138) |
| Ri  | HNKTKYTNKRYADRLGLTPRETSDQGGALTIQQSLFNGGSSVAALKAAQAGFRASRGQYYSSSEQVLLDLI   |   |   | (138) |
| Rw  | HNKTKYTNKRYADRLGLTPRETSDQGGALTIQQSLFNGGSSVAALKAAQAGFRASRGQYYSSSEQVLLDLI   |   |   | (138) |
| Hj  | HNKTKYTNKRYADRLGFTPRETSDQGGALTIQQSLFNGGSSVAALKAAQAGFRASRGQYYSSSEQVLLDLI   |   |   | (138) |
| Ja  | HNKTKYTNKRYADRLGLTPRETSDQGGALTIQQSLFNGGSSVAALKAAQAGFRASRGQYYSSSEQVLLDLI   |   |   | (138) |
| Co  | HNKTKYTNKRYADRLGLTPRETSDQGGALTIQQSLFNGGSSVAALKAAQAGFRASRGQYYSSSEQVLLDLI   |   |   | (138) |
| Si  | HNKTKYTNKRYADRLGLTPRETSDQGGALTIQQSLFNGGSSVAALKAAQAGFRASRGQYYSSSEQVLLDLI   |   |   | (138) |
| Af  | HNKTKYTNKRYADRLGLTPRETSDQGGALTIQQSLFNGGSSVAALKAAQAGFRASRGQYYSSSEQVLLDLI   |   |   | (138) |

|     | 3                                                                       | 4 |       |
|-----|-------------------------------------------------------------------------|---|-------|
| Br  | GAYLDYFESKEKYDISESRVRTNIQQVNTVEEKLRLGEATEIDDIATARAGLAAAETNKLTAAYDFQGGKA |   | (208) |
| Bo  | GAYLDYFESKEKYDISESRVRTNIQQVNTVEEKLRLGEATEIDDIATARAGLAAAETNKLTAAYDFQGGKA |   | (208) |
| Ca  | TVYLDYFESKEKYDISESRVRTNIQQVNTVEEKLRLGEATEIDDIATARAGLAAAETNKLTAAYDFQGGKA |   | (208) |
| Ty  | TAYLDCVESKEKYDISESRVRTNIQQVNTVEEKLRLGEATEIDDIAAARAGLAAAETNKLTAAYDFQGGKA |   | (208) |
| Pr  | TAYLDCVESKEKYDISESRVRTNIQQVNTVEEKLRLGEATEIDDIAAARAGLAAAETNKLTAAYDFQGGKA |   | (210) |
| P22 | TAYLDCVESKEKYDISESRVRTNIQQVNTVEEKLRLGEATEIDDIAAARAGLAAAETNKLTAAYDFQGGKA |   | (210) |
| Ak  | TAYLDCVESKAKYDISESRVRTNIQQVNTVEEKLRLGEATEIDDIATARAGLAAAETNKLTAAYDFQGGKA |   | (208) |
| Fe  | TAYLDCVESKAKYDISESRVRTNIQQVNTVEEKLRLGEATEIDDIATARAGLAAAETNKLTAAYDFQGGKA |   | (208) |
| IS  | TAYLDCVESKAKYDISESRVRTNIQQVNTVEEKLRLGEATEIDDIATARAGLAAAETNKLTAAYDFQGGKA |   | (208) |
| Ma  | TAYLDCVESKAKYDISESRVRTNIQQVNTVEEKLRLGEATEIDDIATARAGLAAAETNKLTAAYDFQGGKA |   | (208) |
| Pe  | TAYLDCVESKAKYDISESRVRTNIQQVNTVEEKLRLGEATEIDDIATARAGLAAAETNKLTAAYDFQGGKA |   | (208) |
| Ri  | TAYLDCVESKAKYDISESRVRTNIQQVNTVEEKLRLGEATEIDDIATARAGLAAAETNKLTAAYDFQGGKA |   | (208) |
| Rw  | TAYLDCVESKAKYDISESRVRTNIQQVNTVEEKLRLGEATEIDDIATARAGLAAAETNKLTAAYDFQGGKA |   | (208) |
| Hj  | TAYLDCVESKAKYDISESRVRTNIQQVNTVEEKLRLGEATEIDDIATARAGLAAAETNKLTAAYDFQGGKA |   | (208) |
| Ja  | TAYLDCVESKAKYDISESRVRTNIQQVNTVEEKLRLGEATEIDDIATARAGLAAAETNKLTAAYDFQGGKA |   | (208) |
| Co  | TAYLDCVESKAKYDISESRVRTNIQQVNTVEEKLRLGEATEIDDIATARAGLAAAETNKLTAAYDFQGGKA |   | (208) |
| Si  | TAYLDCVESKAKYDISESRVRTNIQQVNTVEEKLRLGEATEIDDIATARAGLAAAETNKLTAAYDFQGGKA |   | (208) |
| Af  | TAYLDCVESKAKYDISESRVRTNIQQVNTVEEKLRLGEATEIDDIATARAGLAAAETNKLTAAYDFQGGKA |   | (208) |

4 3 5 6 4

Br NFIRVFGIEPTDIAMPILPQGLPNSLDELTKRAVNLNPEIDSAKHSVTSAKAQELVEKGRLLPQVSVQLQ (278)  
 Bo NFIRVFGIEPTDIAMPILPQGLPNSLDELTKRAVNLNPEIDSAKHSVTSAKAQELVEKGRLLPQVSVQLQ (278)  
 Ca NFIRVFGIAPTNIITMPDLPKMLPASLDELTKKAAKLNPDID SARHNVTSAKASEMAAKGKLLPQVSVKQLQ (278)  
 Ty NFIKVFGEIANDITMPDLPDRLPTSLDEFTRKAAKLNPDID SARHNVSVAKALEMVQKGLLPQVSVKLL (278)  
 Pr NFIKVFGEIANDITMPDLPDRLPISLDEFTRKAAKLNPDID SARHNVTVTKALEMVQKGLLPQVSVKLL (280)  
 P22 NFIKVFGEIANDITMPDLPDRLPISLDEFTRKAAKLNPDID SARHNVTVTKALEMVQKGLLPQVSVKLL (280)  
 Ak NFIRVFGIEATDLTMPNLPDKLPASLDELTRKAAKLNPDID SARHNVISAKALEMVQKGLLPQVSVKQLQ (278)  
 Fe NFIRVFGIEATDITMPNLPDRLPASLDELTKKAAKLNPDID SARHNVTSAKALEMVQKGLLPQVSVKQLQ (278)  
 IS NFIRVFGIEPTNIITMPELPKMLPASLDELTKRAAKLNPDID SARHNITSAKALEMAEKGLLPQVSVQLQ (278)  
 Ma NFIRVFGIEPTNIITMPELPKMLPASLDELTRRAAKLNPDID SARHNVTSAKALEMAEKGLLPQVSVQLQ (278)  
 Pe NFIKVFGEIPTNIITMPELPKMLPASLDELTRRAAKLNPDID SARHNVTAAKALEMAEKGLLPQVSVQLQ (278)  
 Ri NFIRVFGIEPTNIITMPELPKMLPASLDELTRRAAKLNPDID SARHNVTAAKALEMAEKGLLPQVSVQLQ (278)  
 Rw NFIRVFGIEPTNIITMPELPKMLPASLDELTRRAAKLNPDID SARHNVTAAKALEMAEKGLLPQVSVQLQ (278)  
 Hj NFIRVFGIEPTNIITMPELPKMLPASLDELTRRAAKLNPDID SARHNVTAAKALEMAEKGLLPQVSVQLQ (278)  
 Ja NFIRVFGIEPTNIITMPELPKMLPASLDELTRRAAKLNPDID SARHNVTAAKALEMAEKGLLPQVSVQLQ (278)  
 Co NFIRVFGIEPTNIITMPELPKMLPASLDELTRRAAKLNPDID SARHNVTAAKALEMAEKGLLPQVSVQLQ (278)  
 Si NFIRVFGIEPTNIITMPELPKMLPASLDELTRRAAKLNPDID SARHNVTAAKALEMAEKGLLPQVSVQLQ (278)  
 Af NFIRVFGIEPTNIITMPELPKMLPASLDELTRRAAKLNPDID SARHNVTAAKALEMAEKGLLPQVSVQLQ (278)

4 5 7

Br SGKTNYNPQNLN----TQQINTRSVTTTILSVNVPIYPNGGAQYSKIRSAKNQTRNSAIQLDSVIRQTQAY (344)  
 Bo SGKTNYNPQNLN----TKQINTRSVTTTILSVNVPIYPNGGAQYSKIRSAKNQTRNSAIQLDSVIRQTQAY (344)  
 Ca SGRTHYNPQDPV----VQNINTKSVTTTILSVNPIIYPEGGAQYSRIRSAKNQTRNSAVQLDSAIIKQTQAW (344)  
 Ty SGRTYNYPQEPV----IQNINNRIYTTTILAVNPIIYPEGGAQYSRIRSAKNQTRNSVVQLDSAIIKQIKAG (344)  
 Pr SGGTNYNPQEPV----IQNINNRIYTTTILSVNPIIYPEGGAQYSRIRSAKNQTRNSVVQLDSAIIKQIKAG (346)  
 P22 SGGTNYNPQEPV----IQNINNRIYTTTILSVNPIIYPEGGAQYSRIRSAKNQTRNSVVQLDSAIIKQIKAG (346)  
 Ak SGRTDYNPQDPA----VQNINNKSYYTTILSVNPIIYPDGGAQYSRIRSAKNQTRNSAVQLDSAIIKQTQAG (344)  
 Fe SGRTYNYPQDPA----VQNINNKSYYTTILSVNPIIYPNGGAQYSEIRKAKNQTRNSAVQLDSAIIKQTQAG (344)  
 IS SGRTHYNPQDDINARNVNAINNRSYTTTILSVNPIIYPEGGAQYSRIRSAKNQTRNSAVQLDSTIKQTQAG (348)  
 Ma SGRTHYNPQDDI-----NAINNRSYTTTILSVNPIIYPEGGAQYSRIRSAKNQTRNSAVQLDSAIIKQTQAG (344)  
 Pe SGRTYNYPQGDINARNVNAINNRSYTTTILSVNPIIYPEGGAQYSRIRSAKNQTRNSAVQLDNVIKQTQAG (348)  
 Ri SGRTYNYPQGDI-----NAINNRSYTTTILSVNPIIYPEGGAQYSRIRSAKNQTRNSAVQLDNVIKQTQAG (344)  
 Rw SGRTYNYPQGDI-----NAINNRSYTTTILSVNPIIYPEGGAQYSRIRSAKNQTRNSAVQLDNVIKQTQAG (344)  
 Hj SGRTYNYPQDDINARNVNAINNRSYTTTILSVNPIIYPEGGAQYSRIRSAKNQTRNSAVQLDSVIKQTQAG (348)  
 Ja SGRTYNYPQDDINARNVNAINNRSYTTTILSVNPIIYPEGGAQYSRIRSAKNQTRNSAVQLDSVIKQTQAW (348)  
 Co SGRTYNYPQGDI-----NAINNRSYTTTILSVNPIIYPEGGAQYSRIRSAKNQTRNSAVQLDNVIKQTQAG (344)  
 Si SGRTYNYPQGDI-----NAINNRSYTTTILSVNPIIYPEGGAQYSRIRSAKNQTRNSAVQLDNVIKQTQAG (344)  
 Af SGRTYNYPQGDI-----NAINNRSYTTTILSVNPIIYPEGGAQYSRIRSAKNQTRNSAVQLDNVIKQTQAG (344)

7 \* \* 8

Br VISIWEGFEAAKSRIIAADQGVAAAQISYDGTVQEEIVGSKTMLDVLSAEEKLYDAKITRVDAYKASILS (414)  
 Bo VISIWEGFEAAKSRIIAADQGVAAAQISYDGTVQEEIVGSKTMLDVLSAEEKLYDAKITRVDAYKASILS (414)  
 Ca VVSVEGFEAAKSRIIVAAQGVDAQAQISYDGTVQEEIVGSKTILDLVLTAEKLYEAKITRVDAYKSLVLA (414)  
 Ty VVSVEGFETAKSRIVAAQGVAAAQISYNGIVQEEIVGSKTILDLVLDAEQKLYEAKITRVDAYKNSVLA (414)  
 Pr VVSVEGFETAKSRIVAAQGVAAAQISYNGIVQEEIVGSKTILDLVLDAEQKLYEAKITRVDAYKNSVLA (416)  
 P22 VVSVEGFETAKSRIVAAQGVAAAQISYNGIVQEEIVGSKTILDLVLDAEQKLYEAKITRVDAYKNSVLA (416)  
 Ak VVSVEGFEAAKSRIIVAAQGVDAQAQISYDGTVQEEIVGSKTILDLVLDAEQKLYEAKITRVDAYKNSVLA (414)  
 Fe VVSVEGFEAAKSRIIVAAQGVAAAQISYDGTVQEEIVGSKTILDLVLDAEQKLYEAKITRVDAYKNSVLA (414)  
 IS VVSVEGFEAAKSRIIVAAQGVDAQAQISYDGTVQEEIVGSKTILDLVLTAEKLYEAKITRVDAYKSLVLA (418)  
 Ma VVSVEGFEAAKSRIIVAAQGVDAQAQISYDGTVQEEIVGSKTILDLVLTAEKLYEAKITRVDAYKSSVLA (414)  
 Pe VVSVEGFEAAKSRIIVAAQGVDAQAQISYDGTVQEEIVGSKTILDLVLTAEKLYEAKITRVDAYKSSVLA (418)  
 Ri VVSVEGFEAAKSRIIVAAQGVDAQAQISYDGTVQEEIVGSKTILDLVLTAEKLYEAKITRVDAYKSSVLA (414)  
 Rw VVSVEGFEAAKSRIIVAAQGVDAQAQISYDGTVQEEIVGSKTILDLVLTAEKLYEAKITRVDAYKSSVLA (414)  
 Hj VVSVEGFEAAKSRIIVAAQGVDAQAQISYDGTVQEEIVGSKTILDLVLTAEKLYEAKITRVDAYKSSVLA (414)  
 Ja VVSVEGFEAAKSRIIVAAQGVDAQAQISYDGTVQEEIVGSKTILDLVLTAEKLYEAKITRVDAYKSSVLA (414)

|     | 8        | 9              |                          |
|-----|----------|----------------|--------------------------|
| Br  | AYQMKSLT | GELTAQSLKLVKVF | SPSEEEFKTIKKMFIGF (454)  |
| Bo  | AYQMKSLT | GELTAQSLKLVKVF | SPSEEEFKTIKKMFIGF (454)  |
| Ca  | AYHMKLLT | GELTAQNLKLVKVF | SPSEEEFKTIKKMFIGF (454)  |
| Ty  | SYQMKLLA | GELTAKSLKLVKVF | SPSEEEFNLSLKKMFIGF (454) |
| Pr  | SYQMKLLT | GELTAKSLKLVKVF | SPSEEEFNLSLKKMFIGF (456) |
| P22 | SYQMKLLT | GELTAKSLKLVKVF | SPSEEEFNLSLKKMFIGF (456) |
| Ak  | AYQMKLLT | GELTAQSLKLVKVF | SPSEEEFKTIKKMFIGF (454)  |
| Fe  | AYQMKLLT | GELTAQSLKLVKVF | SPSEEEFKTIKKMFIGF (454)  |
| IS  | AYQMKLLT | GELTAQSLKLVKVF | SPSEEEFKTIKKKIFIGF (458) |
| Ma  | AYQMKLLT | GELTAQRLKLVKVF | SPSEEEFKTIKKMFIGF (454)  |
| Pe  | AYQMKLLT | GELTAQSLKLVKVF | SPSEEEFKTIKKMFIGF (458)  |
| Ri  | AYQMKLLT | GELTAQSLKLVKVF | SPSEEEFKTIKKMFIGF (454)  |
| Rw  | AYQMKLLT | GELTAQSLKLVKVF | SPSEEEFKTIKKMFIGF (454)  |
| Hj  | AYQMKLLT | GELTAQSLKLVKVF | SPSEEEFKTIKKMFIGF (454)  |
| Ja  | AYQMKLLT | GELTAQSLKLVKVF | SPSEEEFKTIKKMFIGF (454)  |
| Co  | AYQMKLLT | GELTAQSLKLVKVF | SPSEEEFKTIKKMFIGF (454)  |
| Si  | AYQMKLLT | GELTAQSLKLVKVF | SPSEEEFKTIKKMFIGF (454)  |
| Af  | AYQMKLLT | GELTAQSLKLVKVF | SPSEEEFKTIKKMFIGF (454)  |



## B

Br MSKESKKSQDMSIEDILKSVKGVINERKNL----SNEDEDILELTEIIDQDEEE-LISTKSAEKINDILK (65)  
 Bo MSKESKKSQDMSIEDILKSVKGVINERKNL----SNEDEDILELTEIIDQDEEE-LISTKSAEKINDILK (65)  
 Ca -----MSIEDILKSIKGVINEPKNPIHGNDSSEDEDILELTEIVNQVEEEKLISTKSAAEIGDILK (60)  
 Ty MSKENKKNQDMSIEEILKSIKGIINEHKNPVYENYSADEDILELTDIVNQDEEEKLISTKSASEVEEIFK (70)  
 Pr MNKENKKNQDMSIEEILKSIKGIINERKNPIYDNYSADEDILELTDIVNQNEEENLISTKSASEVEEVFR (70)  
 P22 MNKENKKNQDMSIEEILKSIKGIINERKNPIYDNYSADEDILELTDIVNQNEEENLISTKSASEVEEVFR (70)  
 Ak MSKENKKQDMSVEDILKSIKGVINKHKHNIYENDSEDEDILELTEIVNQDEEEKLISTKSAAEAVGDIFK (70)  
 Fe MSKENKKNQDMSVEDILKSIKGVINERKNPIYENDSEDEDILELTEIVNQDEEEKLISTKSAAEAVGDIFK (70)  
 Is MSKENKKQDMSIEDILKSIKGVINERKNPIHENDSEDEDILELTEIVNQDEEEKLISTKSAAEAVGDIFK (70)  
 Ma MSKENKKNQDMSIEDILKSIKGVINERKNPIHEN---EDVLELLETEIVNQDEEEKLISTKSAAEAVGDIFK (66)  
 Pe MSKDNKKNQDMSIEDILKSIKGVINERKNPIHENDSEDEDVLELLETEIVNQDEEEKLISTKSAAEAVGDIFK (70)  
 Ri -----MSIEDILKAIKGVINERKNPIHENDSEDEDVLELLETEIVNQDEEEKLISTKSAAEAVGDIFK (60)  
 Rw MSKDNKKNQDMSIEDILKAIKGVINERKNPIHENDSEDEDVLELLETEIVNQDEEEKLISTKSAAEAVGDIFK (70)  
 Hj MSKENKKNQDMSIEDILKSIKGVINERKNPIHENDSEDEDVLELLETEIVNQDEEEKLISTKSAAEAVGDIFK (70)  
 Ja MSKENKKNQDMSIEDILKSIKGVINERKNPIHENDSEDEDVLELLETEIVNQDEEEKLISTKSAAEAVGDIFK (70)  
 Co MSKDNKKNQDMSIEDILKSIKGVINERKNPIHENDSEDEDVLELLETEIVNQDEEEKLISTKSAAEAVGDIFK (70)  
 Si -----MSIEDILKSIKGVINERKNPIHENDSEDEDVLELLETEIVNQDEEEKLISTKSAAEAVGDIFK (60)  
 Af MSKDNKKNQDMSIEDILKSIKGVINERKNPIHENDSEDEDVLELLETEIVNQDEEEKLISTKSAAEAVCDIFK (70)

Br NFTSTIKDKLNLDNNVSSKNALEELVIEMLKPELKTWLDKNLPSLVKELVESEIKKLVQNSRK----- (127)  
 Bo NFTSTIKDKLNLDNNVSSKNALEELVIEMLKPELKTWLDKNLPSLVKELVESEIKKLVQNSRK----- (127)  
 Ca NFTDTIKDKKLDNNFSSKNALEELVIEMLKPELKLWLDKNLPLLKELVEIEIKKLVQNSRK----- (122)  
 Ty NFTDTIKDKKLDNNFSSKNALEELVIEMLKPELKVWLDKNLPILVKELVEIEIKKLVQYSKRDGSNY (137)  
 Pr NFTDTIKDKKLDNNFSSKNALEELVIGMLKPELKAWLKKNLPILVKELVEIEIKKLVQYSKRNDNSNY (137)  
 P22 NFTDTIKDKKLDNNFSSKNALEELVIGMLKPELKAWLKKNLPILVKELVEIEIKKLVQYSKRNDNSNY (137)  
 Ak NFTDTIKDKLNLDNNISSKNALEELVTKMLKPELKAWLKKNLPVLVKELVEIEIKKLVQNSRK----- (132)  
 Fe NFTDTIKDKKLDNNISSKNALEELVIEMLKPELKAWLKKNLPVLVKELVEIEIKKLVQNSRK----- (132)  
 Is SFTDTIKDKKLDNNISSKNALEELVIEMLKPELKAWLKKNLPLLKELVEIEIKKLVQNSRK----- (132)  
 Ma NFTDTIKDKKLDNNISSKNALEELVIEMLKPELKAWLKKNLPVLVKELVEIEIKKLVQNSRK----- (128)  
 Pe NFTDTIKDKKLDNNISSKNALEELVIEMLKPELKAWLKKNLPVLVKELVEIEIKKLVKNSRK----- (132)  
 Ri NFTDTIKDKKLDNNISSKNALEELVIEMLKPELKAWLKKNLPVLVKELVEIEIKKLVQNSRK----- (122)  
 Rw NFTDTIKDKKLDNNISSKNALEELVIEMLKPELKAWLKKNLPVLVKELVEIEIKKLVQNSRK----- (132)  
 Hj NFTDTIKDKKLDNNISSKNALEELVIEMLKPELKAWLKKNLSVLVKELVEIEIKKLVQNSRK----- (132)  
 Ja NFTDTIKDKKLDNNISSKNALEELVIEMLKPELKAWLKKNLSVLVKELVEIEIKKLVQNSRK----- (132)  
 Co NFTDTIKDKKLDNNISSKNALEELVIEMLKPELKAWLKKNLPVLVKELVEIEIKKLVQNSRK----- (132)  
 Si NFTDTIKDKKLDNNISSKNALEELVIEMLKPELKAWLKKNLPVLVKELVEIEIKKLVQNSRK----- (122)  
 Af NFTDTIKDKKLDNNISSKNALEELVIEMLKPELKAWLKKNLPVLVKELVEIEIKKLVQNSRK----- (132)

C

## signal sequence

Br -----MLNKLRCRILFFISLSLATLQSYAAAPPPLPMPSONSDIKS---KDEQPTSDSGSSMSIFDKI (59)  
 Bo -----MLNKLRCRILFFISLSLATLQSYAAAPPPLPMPSONSDIKS---KDEQPTSDSGSSMSIFDKI (59)  
 Ca -----MLNKLCKILFFIKLLMTGQSY-AVPPPLPPLSLPDVEVAT--TEDKEFRYNSDTSI--FDKF (57)  
 Ty -----MLNKLCEILFLINLLLVTVGQGY-ASPPPLPQSLPIVAIDTPDKEDKDVSTNFNISF--FEKL (59)  
 Pr -----MLNKLCDILFLINLLLVTVGQGY-ASPPPLPPLSLPIIAVDT---TDKNISTNSNISF--FEKF (56)  
 P22 -----MLNKLCDILFLINLLLVTVGQGY-ASPPPLPPLSLPIIAVDT---TDKNISTNSNISF--FEKF (56)  
 Ak -----MLNKSKCILFFINLLLVVVQSY-ASPPPLPPLSLPAAEVDT---KDKDVSSNSDISF--FDKF (56)  
 Fe -----MLNKLCKILFFINLLLVAVQSY-ASPPP---SLPAAEIDT---KDKDVSSNSDISF--FDKF (53)  
 Is -----MLNKLCKILFFINLLLVAVQSY-ASPPPLPPLSLPAAEVDT---KDKDVSSNSDISF--FDKI (56)  
 Ma MNYLIRNYMLNKLCKILFFINLLLVTVGQSY-ASPPPLPPLSLPVVAVDT---KDKDVRSSADISF--FDKF (64)  
 Pe -----MLNKLCKILFFINLLLVIVQSY-ASPPPLPPLSLPAAEVDT---KDKDVRSSADISF--FDKF (56)  
 Ri -----MLNKLCKILFFINLLLVIVQSY-ASPPPLPPLSLPAAEVDT---KDKDVRASADISF--FDKF (56)  
 Rw -----MLNKLCKILFFINLLLVIVQSY-ASPPPLPPLSLPAAEVDT---KDKDVRASADISF--FDKF (56)  
 Hj -----MLNKLCKILFFINLLLVIVQSY-ASPPPLPPLSLPAEVDT---KYKDVRSSADVFS--FDKF (56)  
 Ja -----MLNKLCKILFFINLLLVIVQSY-ASPPPLPPLSLPTAEVDT---KDKDVRSSADVFS--FDKF (56)  
 Co -----MLNKLCKILFFINLLLVIVQSY-ASPPPLPPLSLPAAEVDT---KDKDVRSSADISF--FDKF (56)  
 Si -----MLNKLCKILFFINLLLVIVQSY-ASPPPLPPLSLPAAEVDT---KDKDVRSSANISF--FDKF (56)  
 Af -----MLNKLCKILFFINLLLVIVQSY-ASPPPLPPLSLPAAEVDT---KDKDVRSSADISF--FDKF (56)

Br KQFFHKSPKKKPLPKPQAQPDKPSDKLVSQEPNKNEVQLPSANNEVHQTNMNLASHND----- (117)  
 Bo KQFFHKSPKKKPLPKPQAQPDKPSDKLVSQEPNKNEVQLPSANNEVHQTNMNLASHNDTNSEKEASEPFI (129)  
 Ca KQFFSK-PQKKYISPKSTNEQ-----TKTADQEEPKL-SQEP----- (92)  
 Ty KQFFSK-QKKNISSQOQEKGO-----TKAIHKESQOQIDPREL----- (95)  
 Pr KQFFSK-QKKNISSQHEQEQ-----TKAIHQESQOQIDSREL----- (92)  
 P22 KQFFSK-QKKNISSQHEQEQ-----TKAIHQESQOQIDSREL----- (92)  
 Ak KQFFSK-SKKKNIHTKQPNEQ-----TKAAPQEEPKLASHEH----- (92)  
 Fe KQFFSK-SKKKNISPKQPNEQ-----TKAANQEEPKLASQEH----- (89)  
 Is KQFFSK-SKKKNIPPKQANEQ-----TKAAHQEEPKLASQES----- (92)  
 Ma KQFFSK-SKKKDIPPKQANEQ-----TKAAHQEELKLASQEP----- (100)  
 Pe KQFFSK-PKKKDIPPKQANEQ-----TKAAHQEEPKLASQEP----- (92)  
 Ri KQFFSK-PKKKDIPPKQANEQ-----TKAAHQEEPKLASQEP----- (92)  
 Rw KQFFSK-PKKKDIPPKQANEQ-----TKAAHQEEPKLASQEP----- (92)  
 Hj KQFFSK-PKKKDIPPKQANEQ-----TKAAHQEEPKLASQEP----- (92)  
 Ja KQFFSK-PKKKDIPPKQANEQ-----TKAAHQEEPKLASQEP----- (92)  
 Co KQFFSK-PKKKDIPPKQASEQ-----TKAAHQEEPKLASQEP----- (92)  
 Si KQFFSK-PKKKDIPPKQASEQ-----TKAAHQEEPKLASKGP----- (92)  
 Af KQFFSK-PKKKDIPPKHASEQ-----TKAAHQEEPKLASQEP----- (92)

Br -----TNSEKEASEPFIIDMGSATLPSASNO----- (142)  
 Bo DMGSATLPSASNOHQANANLASHSGTNSKEASEPFIIDMGSATLPSASNO----- (180)  
 Ca -----NENEHADSEFMDISNVVLPASAASNNVDVYTNT----- (122)  
 Ty -----NENEQSEPFIDVGSVILPSVAN---IHSKF----- (122)  
 Pr -----NENEQSEPFIDFGSTILPSVASNY-IDSKA----- (121)  
 P22 -----NENEQSEPFIDFGSTILPSVASNY-IDSKA----- (121)  
 Ak -----TEDDVSKPFIDVGNTALPSAIASY-EHENGVNLFHDIQESS (133)  
 Fe -----TEADASEPFIIDTGNTALPSVTASN----- (113)  
 Is -----NENEQAEPFIIDVGNTALPSATAIN----- (116)  
 Ma -----NDNEQAEPFIIDVGNTALPSATSND-VHTNP----- (129)  
 Pe -----NDNEQAEPFIIDVGNTALPSATSND-VHTNP----- (121)  
 Ri -----NDNEQAEPFIIDVGNTALPSATSND-VHTNP----- (121)  
 Rw -----NDNEQAEPFIIDVGNTALPSATSND-VHTNP----- (121)  
 Hj -----NDNEQAEPFIIDVGNTALPSATSND-VHANS----- (121)  
 Ja -----NDNEQAEPFIIDVGNTALPSATSND-VHANS----- (121)  
 Co -----NDNEQAEPFIIDVGNTALPSATSND-VHTNP----- (121)  
 Si -----NDNEQAEPFIIDVGNTALPSATSND-VHTNP----- (121)  
 Af -----NDNEQAEPFIIDVGNTALPSATSND-VHTNP----- (121)

```

Br -----THQTNTNLASHS-----DTNSEKEASEPFDIMGNATLPSA--S (178)
Bo -----THQTNTNLASHS-----DTNSEKEASEPFDIMGNATLPSA--S (216)
Ca -----NHSSVNLASYDNIPDIQVMQOEPSESEIAETFIDIGSTKLPSA--TS (168)
Ty -----EYENSTNLASNYNTQDMQVTQOELNSTEASESFFIDIGNTKFI SA--TN (168)
Pr -----EYENSTNLASNYNTQDIQVKQOEFDPSEASEP--IDIGNTKFTSA--TN (166)
P22 -----EYENSTNLASNYNTQDIQVKQOEFDPSEASEP--IDIGNTKFTSA--TN (166)
Ak ETEASKPFIDVGNTALPSAIAASYEHENGVNLAFHD-----IQESETEASKPFIDVGNTALPSAIAAS (195)
Fe -----EHENSVNLASHD-----IQESNETEASKPFIDVGNTALPSA--AS (151)
Is -----EHENSVNLASHDNTPKQVTOQETNESETSEPFIDIGSAKLPSA--TS (162)
Ma -----SHESVNLASHD-----MQESNEAEASEPFDIGSATLPSV--TS (167)
Pe -----SHESVNLASHD-----IQESNEAEASEPFDIGSATLPSV--TS (159)
Ri -----SHESVNLASHD-----IQESNEAEASEPFDIGSATLPSV--TS (159)
Rw -----SHESVNLASHD-----IQESNEAEASEPFDIGSATLPSV--TS (159)
Hj -----SHESVNLAYHA-----IQESNEAEASEPFDIGSATLPSV--TS (159)
Ja -----SHESVNLAYHD-----IQESNEAEASEPFDIGSATLPSV--TS (159)
Co -----SHESVNLASHD-----IQESNEAEASEPFDIGSATLPSV--TS (159)
Si -----SHESVNLASHE-----IQESNEVEVSESFIDIGSATLPSV--TS (159)
Af -----SHESVNLASHD-----IQESNEAEVSEPFIDIGSATLPSV--TS (159)

```

```

Br NQTHQANANLASHDDTKDGAASSEKEANSTPLENTANNEEAQPELKVAGSLISNPPLRPGSYVVPAPRT (248)
Bo NQTHQANANLASHDDTKDGAASSEKEANSTPLENTANNEEAQPELKVAGSLISNPPLRPGSYVVPAPRT (286)
Ca DEMRDAEIAANVH--DEN--LASNI ITRNNIPRP-----MVSIPLARPGSYVVPSPPV (218)
Ty NEMYKEAVLPNDYKKTN--LDFNI I TL--NVLKP-----V--IPTSQDMMDVVPLQOPV (216)
Pr HEMYKEAVSSND--KETN--LTSNI I TP--NVPSP-----VISIPTAQDVNYVVPSPQSV (215)
P22 HEMYKEAVSSND--KETN--LTSNI I TP--NVPSP-----VISIPTAQDVNYVVPSPQSV (215)
Ak YEVHEEEVASNEHKDTN--LSSNI I TP--NVPSP-----IVSMPPAQAGSYVVPSPHRPV (245)
Fe NDVH--TNTEHENSTN--LASNI I TP--NVPSP-----IVSMPPAQAGSYVVPSPQRPV (198)
Is NEMHEEEVDSNEHKDTN--LASNI I TP--NVPSP-----IVSMPPAQAGSYVVPSPQRPV (212)
Ma NEMHEEQVASNEHSDTN--LASNI I TP--NVPSP-----IVSMPPAQAGSYVVPSPQRPV (217)
Pe NEMHEAQVASNEHNDTN--LASNI I IP--NVPSP-----IVSMPPAQAGSYVVPSPQRPV (209)
Ri NEMHEAQVASNEHNDTN--LASNI I IP--NVPSP-----IVSMPPAQAGSYVVPSPQRPV (209)
Rw NEMHEAQVASNEHNDTN--LASNI I IP--NVPSP-----IVSMPPAQAGSYVVPSPQRPV (209)
Hj NEMHEAQVASNEHNDTN--LASNI I TP--NVPSP-----IVSMPPAQAGSYVVPSPQRPV (209)
Ja NEMHEAQVASNEHNDTN--LVSNI I TP--NVPSP-----IVSMPPAQAGSYVVPSPQRPV (209)
Co NEMHEAQVASNEHNDTN--LASNI I IP--NVPSP-----IVSMPPAQAGSYVVPSPQRPV (209)
Si NEMHEAQVASNEHNDTN--LASNI I IP--NVPSP-----IVSMPPAQAGSYVVPSPQRPV (209)
Af NEMHEAQVASNEHNDTN--LASNI I IP--NVPSP-----IVSMPPAQAGSYVVPSPQRPV (209)

```

```

Br QVYQPIALPPTHQY--IKLTPPPEANEQQDNVTAPPPP---QVVAPAPTVMPATPIPVVNQPTASD--VVTP (313)
Bo QVYQPIALPPTHQY--IKLTPPPEANEQQDNVTAPPPP---QVVAPAPTVMPATPIPVVNQPTASD--VVTP (351)
Ca QIYKPTNLLAVHKKHILLNPPPDVHKTQESI IPIAPPATSSI----PNMPAISLPAVSTPVTQD--TNPS (282)
Ty QIYKPTNLTISI--P--KLFNHDTNLNVEKNLES-----TM-----SNMTTISPMLSVPTTQD--TIPT (270)
Pr QIYKPTNLTISRNP--IPLNHHTDLNKVEKNLES-----TI-----SNMTTIPTNMVSVPSIQD--TIQT (271)
P22 QIYKPTNLTISRNP--IPLNHHTDLNKVEKNLES-----TI-----SNMTTIPTNMVSVPSIQD--TIQT (271)
Ak QIYKPTNLLSVHRP--IPLNTPPDAYKEAESVAPO-----SI-----PNMPAVSPPVI-----QDITTPS (298)
Fe QIYKPTNLPVHHP--IPLNPPPEANKEEESVAPIAPQ---SI-----PNMPAVSPPVVSPPVIQDTTTPS (259)
Is QIYKPTNLPVHHP--IPLNPPPDANKEEESVAPIAPP---SI-----PNMPAVSPPVVSPPVTQD--ITPS (272)
Ma QIYKPTNLPVHHP--IPLNPPPDANKEEESVAPIAPP---SI-----PNMPAVSPPVVSPPVTQD--TTSS (277)
Pe QIYKPTNLPVHHP--IPLNPPPDANKEEESVAPIAPP---SI-----TNIPAVSPPVVSPPVTQD--NTSS (269)
Ri QIYTPTNLPVHHP--IPLNPPPDANKEEESVAPIAPP---SI-----TNIPAVSPPVVSPPVTQD--NTSS (269)
Rw QIYTPTNLPVHHP--IPLNPPPDANKEEESVAPIAPP---SI-----TNIPAVSPPVVSPPVTQD--NTSS (269)
Hj QIYKPTNLPVHHP--IPLNPPPDANKEEESVAPIAPP---SI-----PNMPAVSPPVVSPPVTQD--TTSS (269)
Ja QIYKPTNLPVHHP--IPLNTPPDANKEEESVAPIAPP---SI-----PNMPAVSPPVVSPPVTQD--TTSS (269)
Co QIYKPTNLPVHHP--IPLNPPPDANKEEESA---ALP---SI-----TNIPAVSPPVVSPPVTQD--NTSS (266)
Si QIYKPTNLPVHHP--IPFNPPPDANKEEESVAPIAPP---SI-----TNIPAVSPPVVSPPVTQD--NTSS (269)
Af QIYKPTNLPVHHP--IPLNPPPDANKEEESVAPIAPP---SI-----TNIPAVSLPVVSPPVTQD--NTSS (269)

```



Br PITTPVPVPATPSTP-NTPVPTVNPQAAAPTAPSNTPIPAVQPVVPPATMPNTTDS SAKTDNSKETFTADV (382)  
 Bo PITTPAPVPATPSTP-NTPVPTVNPQAAAPTAPSNTPIPAVQPVVPPATMPNTTDS SAKTDNSKETFTADV (420)  
 Ca TIPAIVPLVGTTPVPSNVVPLAMPTDQPSSTQPIIMPSSNTAISTTPIVVPDTNFSADINNSQETLTASS (352)  
 Ty TLNITVPTPTTETHVNVPSSTMMHSNNHSTQPIITISINTPVDTSSTVVATESSMAINNSQERFVSTS (340)  
 Pr TLNITVPTPTTETHVSVQSTVMHSNQSAQPIITPISINTPVETSSTVLRATES SVPINNSQEIFVSES (338)  
 P22 TLNITVPTPTTETHVSVQSTVMHSNQSAQPIITPISINTPVETSSTVLRATES SVPINNSQEIFVSES (338)  
 Ak TMPTTVPTPTTETHVSVQSTVMHSNQSAQPIITPISINTPVETSSTVLRATES SVPINNSQEIFVSES (364)  
 Fe TMPTTVPTPTTETHVSVQSTVMHSNQSAQPIITPISINTPVETSSTVLRATES SVPINNSQEIFVSES (325)  
 Is TMPTTVPTPTTETHVSVQSTVMHSNQSAQPIITPISINTPVETSSTVLRATES SVPINNSQEIFVSES (342)  
 Ma TMPTTVPTPTTETHVSVQSTVMHSNQSAQPIITPISINTPVETSSTVLRATES SVPINNSQEIFVSES (343)  
 Pe TMPTTVPTPTTETHVSVQSTVMHSNQSAQPIITPISINTPVETSSTVLRATES SVPINNSQEIFVSES (335)  
 Ri TMPTTVPTPTTETHVSVQSTVMHSNQSAQPIITPISINTPVETSSTVLRATES SVPINNSQEIFVSES (335)  
 Rw TMPTTVPTPTTETHVSVQSTVMHSNQSAQPIITPISINTPVETSSTVLRATES SVPINNSQEIFVSES (335)  
 Hj TMPTTVPTPTTETHVSVQSTVMHSNQSAQPIITPISINTPVETSSTVLRATES SVPINNSQEIFVSES (339)  
 Ja TMPTTVPTPTTETHVSVQSTVMHSNQSAQPIITPISINTPVETSSTVLRATES SVPINNSQEIFVSES (339)  
 Co TMPTTVPTPTTETHVSVQSTVMHSNQSAQPIITPISINTPVETSSTVLRATES SVPINNSQEIFVSES (332)  
 Si TMPTTVPTPTTETHVSVQSTVMHSNQSAQPIITPISINTPVETSSTVLRATES SVPINNSQEIFVSES (335)  
 Af TMPTTVPTPTTETHVSVQSTVMHSNQSAQPIITPISINTPVETSSTVLRATES SVPINNSQEIFVSES (335)

Br NLPKKQDWDAPLKPVEVLSANQNGSN---NTNAANNSVPAKQKIQPQNTSTSVS SSNVVKKQDNIVN (449)  
 Bo NLPKKQDWDAPLKPVEVLSANQNGSN---NTNAANNSVPAKQKIQPQNTSTSVS SSNVVKKQDNIVN (487)  
 Ca NIPKKQDWNTPVIPVNVNPN--QSKS--SEMQVKNSQTTNNQEKSLP-----VSPNVMQEQYNNIN (412)  
 Ty EATKKQDWTPIIPVLVDPNKSRLNSLALEKKIDNDQIINNQAESHS-----VSSNVTIQKQDNKVN (404)  
 Pr ESTKKQDWTPIIMPVLVDPNKSQSKPLALEQKNNNDQIINNQAESHS-----VSSNVTIQKQDNKVN (402)  
 P22 ESTKKQDWTPIIMPVLVDPNKSQSKPLALEQKNNNDQIINNQAESHS-----VSSNVTIQKQDNKVN (402)  
 Ak DVQKKQDWNTPVIPVNVNPN--QPQT--LEKQV--NSQTTNNQEKSP-----VSSNVTIQKQDNKVN (423)  
 Fe DVPKKQDWNTPVIPVNVNPN--QPQA--LEKQVNNQTTNNQEKSP-----VSSNVTIQKQDDKVN (385)  
 Is DVPKKQDWNTPVIPVNVNPN--QPQP--LEKQVNNQTTNNQEKSP-----VSSNVTIQKQDDKVN (404)  
 Ma ---KNQDWNTPVIPVNVNPN--QLQP--LEKQVNNQTTNNQEKSP-----VSSNVTIQKQDNKVN (400)  
 Pe DVPKKQDWNTPVIPVNVNPN--QLQP--L--QINNQTNNQEKSP-----ASSPNVTIQKQDNKVN (393)  
 Ri DVPKKQDWNTPVIPVNVNPN--QLQP--L--QINNQTNNQEKSP-----ASSPNVTIQKQDNKVN (393)  
 Rw DVPKKQDWNTPVIPVNVNPN--QLQP--L--QINNQTNNQEKSP-----ASSPNVTIQKQDNKVN (393)  
 Hj DVPKKQDWNTPVIPVNVNPN--QFQP--LEKQVNNQTTNNQEKSP-----LNSPNVTIQKQDNKVN (399)  
 Ja DVPKKQDWNTPVIPVNVNPN--QFQP--LEKQVNNQTTNNQEKSP-----VSSPNVTIQKQDNKVN (399)  
 Co DVPKKQDWNTPVIPVNVNPN--QLQP--L--QINNQTNNQEKSP-----VSSPNVTIQKQDNKVN (390)  
 Si DVPKKQDWNTPVIPVNVNPN--QLQP--L--QINNQTNNQEKSP-----VSSPNVTIQKQDNKVN (393)  
 Af DVPKKQDWNTPVIPVNVNPN--QLQP--L--QINNQTNNQEKSP-----VSSPNVTIQKQDNKVN (393)

Br TELTESATKFAKDESQMLLLPDDDIILGKLTEQATLDQMDIYSYIKLFQKKEEWIANADRRKAVESLVKY (519)  
 Bo TELTESATKFAKDESQMLLLPDDDIILGKLTEQATLDQMDIYSYIKLFQKKEEWIANADRRKAVESLVKY (557)  
 Ca NETSELVTKFVKDEQMLLLPDDDIIVLGLKTEQATLEQMDMYAYIKLFQKKEEWIANAEERRKVVESFIKY (482)  
 Ty NETSELVTKFVKDEQMLLLPDDDIIVLGLKTEQATLEQMDMYAYIKLFQKKEEWIANAEERRKVVESFIKY (474)  
 Pr NATSESTKFEVKNETQMLFLPDDDIIVLGLKTEQATLEQMDMHGYIKLFQKKEEWIANAEERRKVVESFIKY (472)  
 P22 NATSESTKFEVKNETQMLFLPDDDIIVLGLKTEQATLEQMDMHGYIKLFQKKEEWIANAEERRKVVESFIKY (472)  
 Ak NETSVSTIKFVKDEQMLLLPDDDIIVLGLKTEQATLEQMDMYAYIALFQKKEEWIASAKRRKVVESFIKY (493)  
 Fe NETSESTKFEVKNETQMLLLPDDDIIVLGLKTEQATLEQMDMYAYIELFQKKEEWIASAKRRKVVESFIKY (455)  
 Is NETSKSTTKFVKDEQMLLLPDDDIIVLGLKTEQATLEQMDMYAYIELFQKKEEWIASAERRKVVESFIKY (474)  
 Ma NETSELVTKFVKDEQMLLLPDDDIIVLGLKTEQATLEQMDMYAYIELFQKKEEWIASTERRKVVESFIKY (470)  
 Pe NETSELVTKFVKDEQMLLLPDDDIIVLGLKTEQATLEQMDMYAYIKLFQKKEEWIASAERRKVVESFIKY (463)  
 Ri NETSELVTKFVKDEQMLLLPDDDIIVLGLKTEQATLEQMDMYAYIELFQKKEEWIASAERRKVVESFIKY (463)  
 Rw NETSELVTKFVKDEQMLLLPDDDIIVLGLKTEQATLEQMDMYAYIELFQKKEEWIASAERRKVVESFIKY (463)  
 Hj NETSELVTKFVKDEQMLLLPDDDIIVLGLKTEQATLEQMDMYAYIELFQKKEEWIASAERRKVVESFIKY (469)  
 Ja NETSELVTKFVKDEQMLLLPDDDIIVLGLKTEQATLEQMDMYAYIELFQKKEEWIASAERRKVVESFIKY (469)  
 Co NETSELVTKFVKDEQMLLLPDDDIIVLGLKTEQATLEQMDMYAYIELFQKKEEWIASAERRKVVESFIKY (460)  
 Si NETSELVTKFVKDEQMLLLPDDDIIVLGLKTEQATLEQMDMYAYIELFQKKEEWIASAERRKVVESFIKY (463)  
 Af NETSELVTKFVKDEQMLLLPDDDIIVLGLKTEQATLEQMDMYAYIELFQKKEEWIASAERRKVVESFIKY (463)

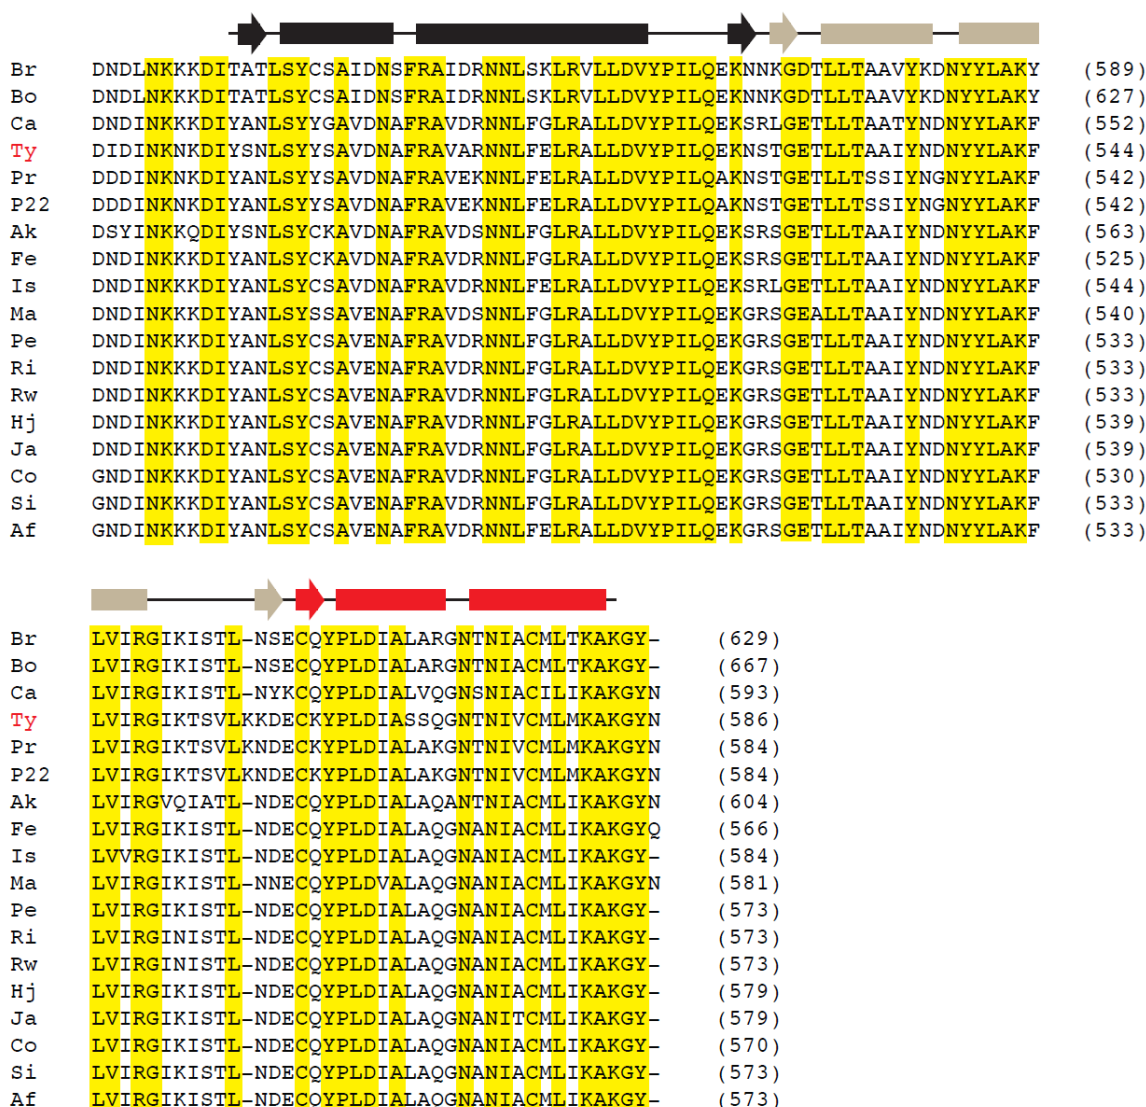

**Figure S2. Comparative sequence analysis of proteins encoded by (A) *RT0216*, (B) *RT0217* and (C) *RT0218* across 18 *Rickettsia* genomes.** Sequences were obtained from the PATRIC website (4). The rickettsial species/strains are abbreviated as follows: Br, *R. bellii* str. RML369-C; Bo, *R. bellii* str. OSU 85 389; Ca, *R. canadensis* str. McKiel; Ty, *R. typhi* str. Wilmington; Pr, *R. prowazekii* str. Madrid E; P22, *R. prowazekii* str. Rp22; Ak, *R. akari* str. Hartford; Fe, *R. felis* str. URRWXCal2; IS, *Rickettsia* endosymbiont of *Ixodes scapularis*; Ma, *R. massilae* str. MTU5; Pe, *R. peacockii* str. Rustic; Ri, *R. rickettsii* str. Sheila Smith; Rw, *R. rickettsii* str. Iowa; Hj, *R.*

*heilongjiangensis* str. 054; Ja, *R. japonica* str. YH; Co, *R. conorii* str. Malish 7, Si, *R. sibirica* str. 246; Af, *R. africae* str. ESF-5. All alignments were constructed using MUSCLE v3.6 (3) with default parameters. Positions within the alignment that are highlighted yellow depict invariant residues across all sequences. Coordinates for each sequence (aa) are shown in parentheses at right. N-terminal signal sequences, as predicted with SignalP 4.0 (7), are shaded gray. **(A)** TolC protein alignment with secondary structure model shown at top (see Figure S4 for details). **(B)** Alignment of PopZ-like sequences with the conserved N- and C-terminal regions illustrated at top and colored blue and orange, respectively. The conserved regions are described in the text and shown in more detail in Figure S3. **(C)** RARP-1 protein alignment with repeat regions illustrated within the central domain. The repeat region proximal to the N-terminus is shown in blue and ranges from 2-4 repeats across rickettsial sequences (each repeat per sequence is shaded darker to demarcate the multiple repeats per sequence). The repeat region flanking the ANK domain is shown in green and contains two predicted repeats per sequence. Conserved residues within the repeat regions are boxed. Repeats were predicted using HHrepID v2.16.1 (1). The three ankyrin repeats within the ANK domain are illustrated as described in Figure 2 and Figure S1. NOTE: the region used to design the RARP-1 antibody (EKGQTKAIHKESQQIDPRE) is bolded (pos. 76-94).

Figure S3

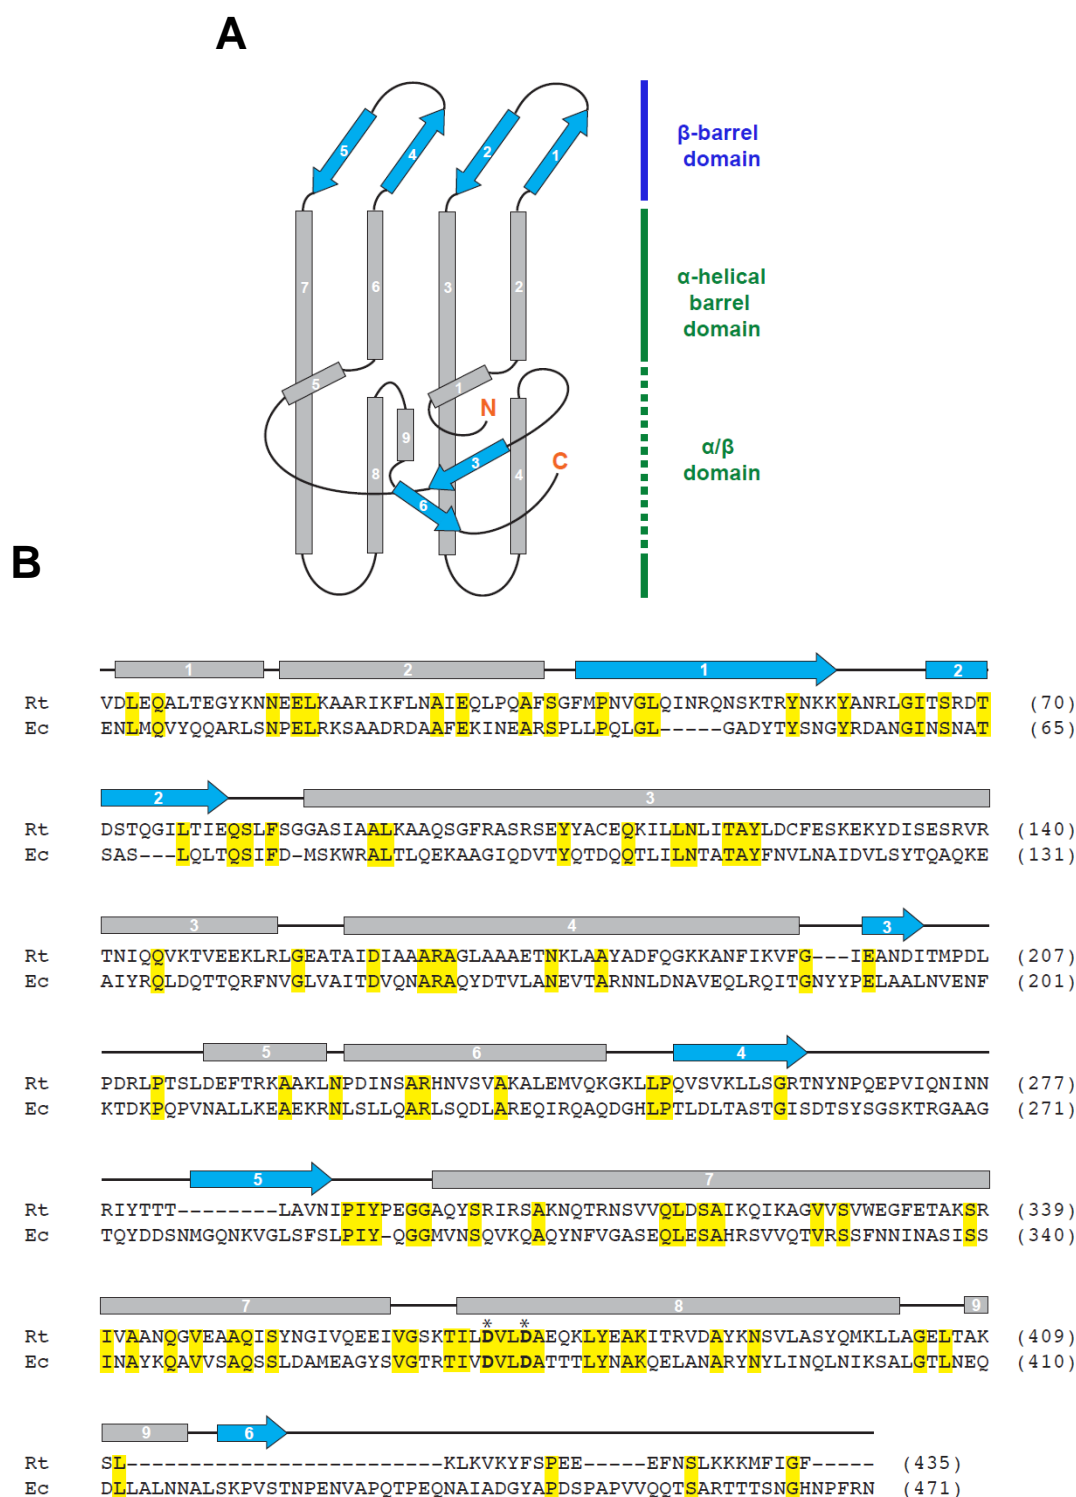



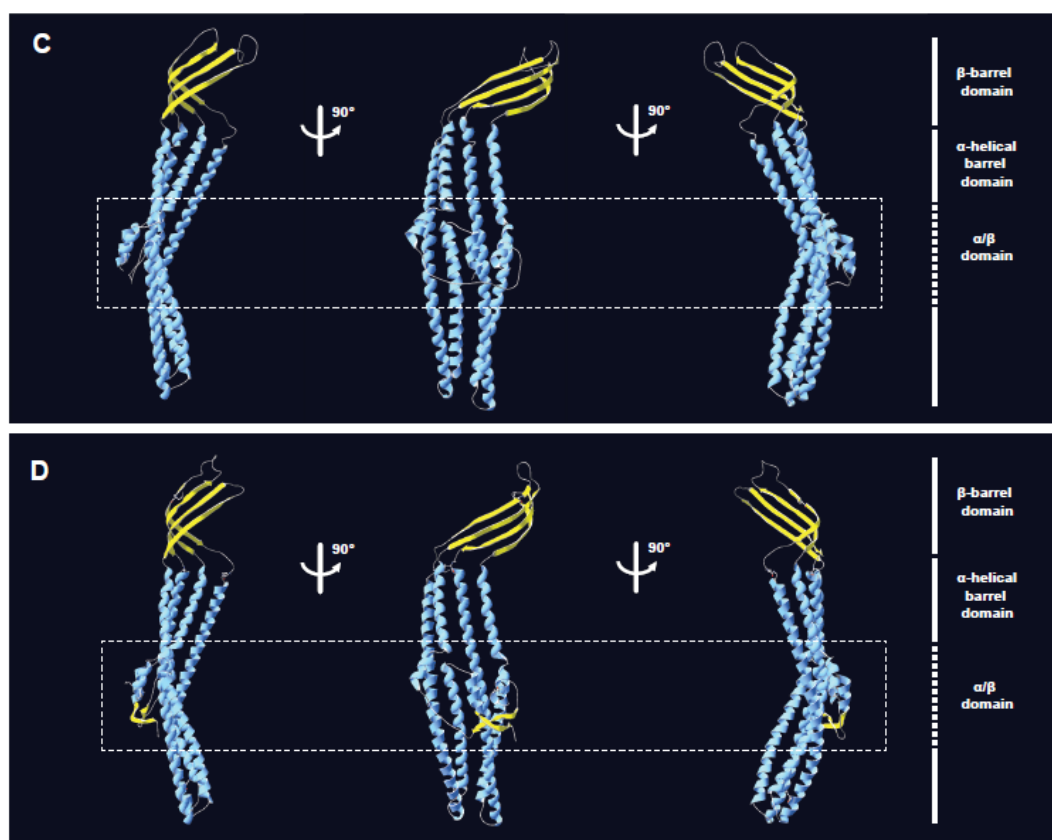

**Figure S3. Bioinformatics analysis of the *R. typhi* TolC.** (A) Diagram depicting the secondary structure of *Escherichia coli* TolC (5). The gray and blue bars correspond to the  $\alpha$ -helices and  $\beta$ -strands, respectively. (B) Multiple sequence alignment of *R. typhi* (Rt, YP\_067180) and *E. coli* (Ec, ZP\_04872262) TolC proteins. Structural model at top depicts secondary structure shown in A. Conserved positions within the alignment are highlighted yellow. Coordinates for each sequence (aa) are shown in parentheses at right. (C, D) Structural modeling of *R. typhi* TolC (shown as a monomer, C) with the TolC monomer of *E. coli* (pdb 1ek9C, D). The  $\alpha$ -helices are shown in blue, with  $\beta$ -strands colored yellow. The dashed box depicts the  $\alpha/\beta$  domain that encompasses  $\beta$ -strands B3 and B6, which are absent in the *R. typhi* TolC structure prediction.

## Figure S4

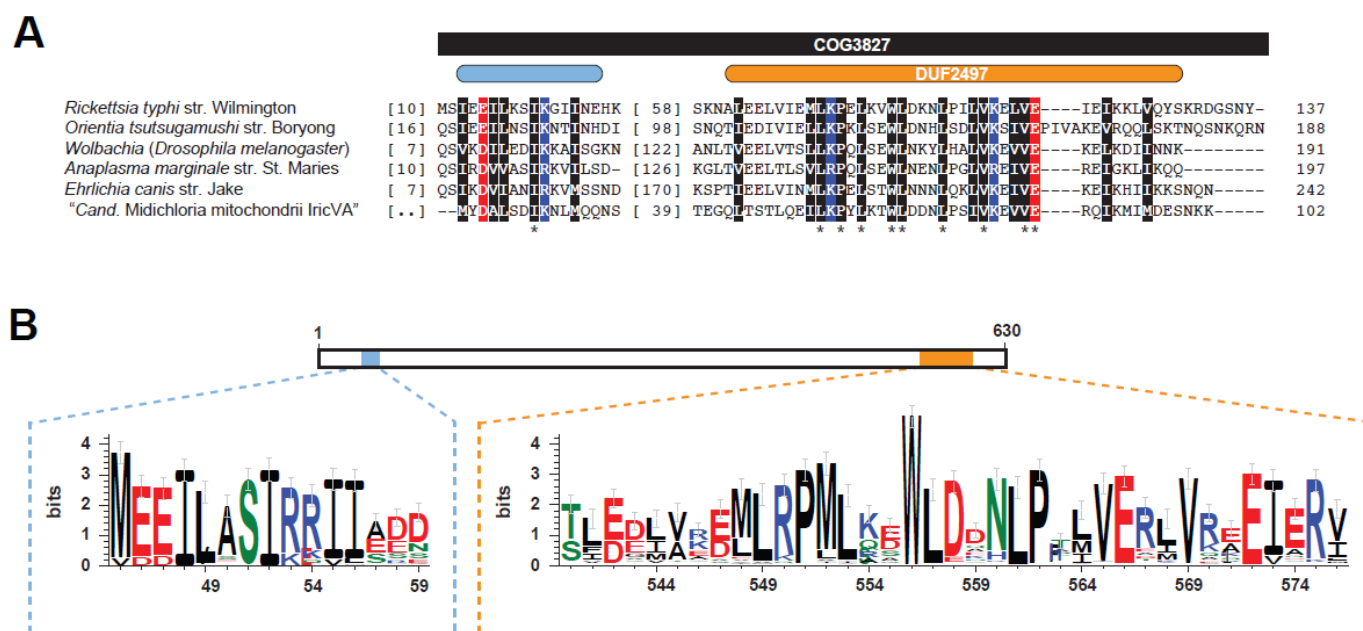

**Figure S4. *R. typhi* RT0217 encodes a putative PopZ homolog.** (A) Multiple sequence alignment of six *Rickettsiales* PopZ-like proteins: HP RT0217 (*Rickettsia typhi* str. Wilmington, YP\_067181); HP OTBS\_0399 (*Orientia tsutsugamushi* str. Boryong, YP\_001248323); HP WD0069 (*Wolbachia* endosymbiont of *Drosophila melanogaster*, NP\_965897); HP AM1025 (*Anaplasma marginale* str. St. Maries, YP\_154161); HP Ecaj\_0824 (*Ehrlichia canis* str. Jake, YP\_303453); HP midi\_00757 (“*Candidatus* *Midichloria mitochondrii* str. IricVA”, YP\_004679733). See text for alignment details. NOTE: genes encoding PopZ-like sequences were not detected in *Neorickettsia* genomes. The conserved N-terminal (light-blue) and C-terminal (orange) domains are illustrated above the alignment. Invariant residues are depicted with an asterisk below the alignment. Amino acid conservation is shown for polar (green), non-polar (black), acidic (red), and basic (blue) residues. (B) A more extensive search for potential HP RT0217 homologs revealed 122 sequences within alphaproteobacterial genomes, with robust

sequence comparison illustrating the conserved small N-terminal and C-terminal regions within an alignment encompassing extraordinary variability in sequence length and composition. Schema depicts multiple sequence alignment (1-630 positions) with conserved N- and C-terminal domains and sequence conservation across 122 alphaproteobacterial PopZ-like sequences shaded as in **A**. The conserved regions are illustrated with sequence logos (2), with amino acid classes colored as in **A**.

## Figure S5

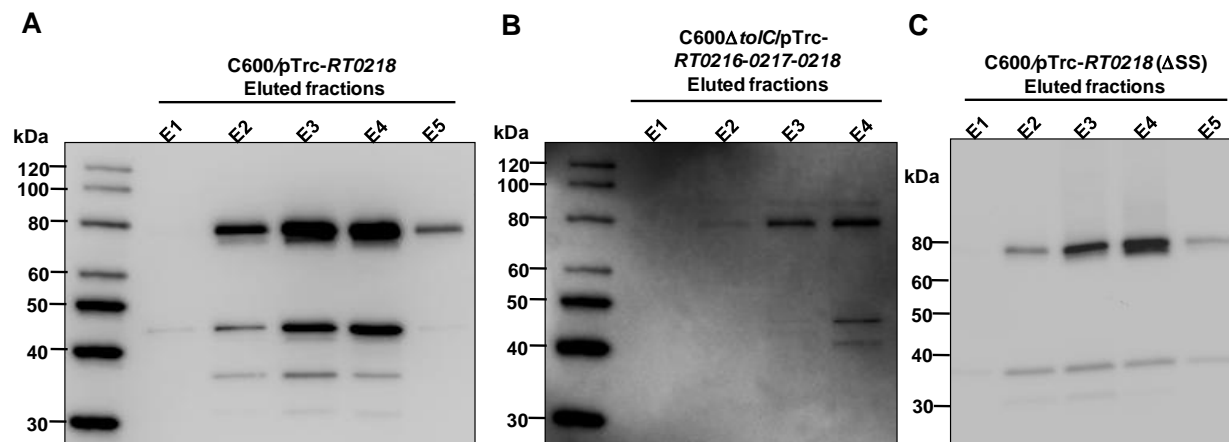

**Figure S5. Recombinant protein expression and purification of RARP-1.** *E. coli* C600/pTrc-RT0218 (A), *E. coli* C600ΔtolC/pTrc-RT0216-RT0217-RT0218 (B), and *E. coli* Top10 cells harboring pTrc-RT0218 ΔSS (C) were induced by addition of IPTG to a final concentration of 1mM. The bacterial cells were harvested by centrifugation at 8,000 xg for 20 min and lysed with french press cell disrupter. The cleared cell lysate with recombinant full-length RARP-1 and RARP-1ΔSS was incubated with nickel chelated agarose and recombinant protein was purified under native conditions. The purified proteins were separated by SDS-PAGE following dialysis and concentrating. The recombinant full-length RARP-1 and RARP-1 ΔSS (~80kDa) was identified by immunoblotting using anti-RT0218 antibodies. The purity of the protein was assessed with coomassie stain (data not shown).



## TABLES

**Table S1.** Primers used in the study.

| Primer       | Sequence ( 5' → 3')                 |
|--------------|-------------------------------------|
| RT0218-SS F  | ATG TTA AAT AAA TTA TGT GAG ATA     |
| RT0218-R2    | ATT ATA CCC CTT AGC TTT CAT TAA     |
| RT0218-F1    | TCG CCT CCG CCA TTA CCA CAA TCA     |
| RT0218-R3    | AAT ATC TTT ATT TTT ATT GAT ATC     |
| RT0216-F2    | ATG AGT AAA TTA ACT ACA TTT ATT     |
| RT0216-F1    | TCC GCA AGA GCC AGT TAT TC          |
| RT0216-R1    | AAT CCT TCC CAC ACG CTA AC          |
| RT0218 RT-F1 | TCA TTC TAC ACA GCC TAT AAC GAC     |
| RT0218 RT-R1 | TGG GAT CAA CTA CAA GAA CTG G       |
| RT0218 RT-R2 | ACT AAC ATC CTT ATC TTC CTT ATC TGG |
| AZ5194-F     | TCT ATT ATT GGT GAC AGG GC          |
| AZ5195-R     | CAT CCT TAT CTT CCT TAT CTG G       |
| AZ4923       | CTC CTG CCT TAG AAT CCA ACC C       |
| AZ4924       | TTC CTT TAC ACT ATG CTT TTC ACC AG  |
| AZ2249-F     | ACA ATC TGT GTG GGC ACT CG          |
| AZ2248-R     | GGC TGA AAA TCT TCT CTC ATC CGC     |

**Table S2.** RT0218 homologs of *Rickettsia* spp.

| Accession number               | Protein Homologue/Locus tag                  | Rickettsial species                                                     | Strain        | Bit score           | Identities |
|--------------------------------|----------------------------------------------|-------------------------------------------------------------------------|---------------|---------------------|------------|
| <a href="#">YP_067182.1</a>    | hypothetical protein RT0218                  | <i>Rickettsia typhi</i>                                                 | Wilmington    | 1192                |            |
| <a href="#">NP_220612.1</a>    | hypothetical protein RP226                   | <i>Rickettsia prowazekii</i>                                            | Madrid E      | 827                 | 79%        |
| <a href="#">ZP_04699593.1</a>  | ankyrin repeat-containing domain protein     | <i>Rickettsia</i><br><i>endosymbiont of</i><br><i>Ixodes scapularis</i> | -             | 647                 | 63%        |
| <a href="#">YP_004764027.1</a> | Rh054_01760                                  | <i>Rickettsia</i><br><i>heilongjiangensis</i>                           | 054           | 586                 | 59%        |
| <a href="#">YP_002844975.1</a> | Ankyrin repeat protein                       | <i>Rickettsia africae</i>                                               | ESF-5         | 585                 | 58%        |
| <a href="#">YP_247003.1</a>    | ankyrin repeat-containing protein<br>RF_0987 | <i>Rickettsia felis</i>                                                 | URRWXCal<br>2 | 580                 | 59%        |
| <a href="#">YP_002916264.1</a> | hypothetical protein RPR_01695               | <i>Rickettsia peacockii</i>                                             | Rustic        | <a href="#">578</a> | 59%        |
| <a href="#">YP_001499117.1</a> | ankyrin repeat-containing protein            | <i>Rickettsia massiliae</i>                                             | MTU5          | 578                 | 60%        |
| <a href="#">ZP_00142229.1</a>  | hypothetical protein                         | <i>Rickettsia sibirica</i>                                              | 246           | 576                 | 58%        |
| <a href="#">YP_001491992.1</a> | threonyl-tRNA synthetase                     | <i>Rickettsia canadensis</i>                                            | McKiel        | 577                 | 54%        |
| <a href="#">NP_359945.1</a>    | hypothetical protein RC0308                  | <i>Rickettsia conorii</i>                                               | Malish 7      | 573                 | 59%        |

|                                |                                     |                              |              |     |     |
|--------------------------------|-------------------------------------|------------------------------|--------------|-----|-----|
| <a href="#">YP_001494426.1</a> | hypothetical protein A1G_01760      | <i>Rickettsia rickettsii</i> | Sheila Smith | 568 | 58% |
| YP_001649675.1                 | hypothetical protein<br>RrIowa_0373 | <i>Rickettsia rickettsii</i> | Iowa         | 568 | 58% |
| <a href="#">YP_001493155.1</a> | ankyrin repeat-containing protein   | <i>Rickettsia akari</i>      | Hartford     | 558 | 55% |
| <a href="#">YP_537401.1</a>    | ankyrin repeat-containing protein   | <i>Rickettsia bellii</i>     | RML369-C     | 347 | 39% |
| <a href="#">YP_001496681.1</a> | ankyrin repeat-containing protein   | <i>Rickettsia bellii</i>     | OSU 85-389   | 340 | 43% |

**Table S3.** TolC homologs of *Rickettsia* spp.

| Accession number               | Protein Homologue                                   | <i>Rickettsial species</i>                          | Strain     | Bit score | Locus tag of homolog |
|--------------------------------|-----------------------------------------------------|-----------------------------------------------------|------------|-----------|----------------------|
| <a href="#">YP_067180.1</a>    | Outer membrane protein TolC precursor               | <i>Rickettsia typhi</i>                             | Wilmington | 921       | RT0216               |
| <a href="#">NP_220612.1</a>    | Outer membrane protein TolC precursor               | <i>Rickettsia prowazekii</i>                        | Madrid E   | 827       | RP224                |
| <a href="#">ZP_04699593.1</a>  | Type I secretion outer membrane protein TolC        | <i>Rickettsia prowazekii</i>                        | Rp22       | 850       | ADE29736             |
| <a href="#">YP_247001.1</a>    | TolC family type I secretion outer membrane protein | <i>Rickettsia felis</i>                             | URRWXCal2  | 795       | RF_0985              |
| <a href="#">YP_001493153.1</a> | TolC family type I secretion outer membrane protein | <i>Rickettsia akari</i>                             | Hartford   | 792       | A1C_01670            |
| <a href="#">ZP_04699596.1</a>  | Type I secretion outer membrane protein TolC        | <i>Rickettsia endosymbiont of Ixodes scapularis</i> |            | 757       | ZP_04699596          |
| <a href="#">YP_001499115.1</a> | Type I secretion outer membrane protein TolC        | <i>Rickettsia massiliae</i>                         | MTU5       | 751       | RMA_0312             |
| <a href="#">ZP_00142231.1</a>  | Outer membrane protein tolC precursor               | <i>Rickettsia sibirica</i>                          | 246        | 749       | Rsib_orf.398         |
| <a href="#">NP_359943.1</a>    | Outer membrane protein tolC precursor               | <i>Rickettsia conorii</i>                           | Malish 7   | 748       | RC0306               |
| <a href="#">YP_002844973.1</a> | Type I secretion outer membrane protein             | <i>Rickettsia africae</i>                           | ESF-5      | 746       | RAF_ORF0284          |



|                                |                                                         |                                     |              |     |             |
|--------------------------------|---------------------------------------------------------|-------------------------------------|--------------|-----|-------------|
|                                | TolC                                                    |                                     |              |     |             |
| <a href="#">YP_004764024.1</a> | Outer membrane protein tolC                             | <i>Rickettsia heilongjiangensis</i> | 054          | 745 | Rh054_06640 |
| <a href="#">YP_002916267.1</a> | Type I secretion outer membrane protein, TolC precursor | <i>Rickettsia peacockii</i>         | Rustic       | 744 | RPR_01710   |
| <a href="#">YP_001494423.1</a> | Outer membrane protein tolC precursor                   | <i>Rickettsia rickettsii</i>        | Sheila Smith | 743 | AIG_01745   |
| YP_001649672.1                 | Type I secretion outer membrane protein                 | <i>Rickettsia rickettsii</i>        | Iowa         | 743 | RrIowa_0370 |
| <a href="#">YP_001491990.1</a> | Outer membrane protein tolC precursor                   | <i>Rickettsia canadensis</i>        | McKiel       | 720 | AIE_01300   |
| <a href="#">YP_537404.1</a>    | Type I secretion outer membrane protein<br>TolC         | <i>Rickettsia bellii</i>            | RML369-C     | 659 | RBE_0234    |
| <a href="#">YP_001496685.1</a> | Type I secretion outer membrane protein<br>TolC         | <i>Rickettsia bellii</i>            | OSU 85-389   | 657 | A11_06660   |

**Table S4.** Primary and secondary antibodies used in the study.

| <b>Antibody target</b>                                | <b>Host animal</b>  | <b>Dilution</b> | <b>Antibody Source</b> |
|-------------------------------------------------------|---------------------|-----------------|------------------------|
| RT0218                                                | Rabbit (polyclonal) | 1:500           | This study             |
| EF-Ts ( <i>R. typhi</i> )                             | Rabbit (polyclonal) | 1:2000          | This laboratory (8)    |
| GAPDH                                                 | Mouse (monoclonal)  | 1:1000          | Abcam                  |
| <i>R. typhi</i>                                       | Rat (serum)         | 1:500           | This laboratory        |
| Mouse IgG, HRP-linked                                 | Sheep               | 1:5000          | GE Healthcare          |
| Rabbit IgG, HRP-linked, F (ab') <sub>2</sub> fragment | Donkey              | 1:5000          | GE Healthcare          |
| Rabbit IgG, Alexa Fluor 594-conjugated                | Goat                | 1:300           | Molecular Probes       |
| Rat IgG, Alexa Fluor 488-conjugated                   | Goat                | 1:200           | Molecular Probes       |

**Table S5.** Peptides identified in a unique immogenic band (approximately 80kDa) from cellular pellets and culture supernatant *E. coli* cells by mass spectrometry.

| Sample                                                 | Identified peptides matching RARP-1                                                                                                                                                                                  | Position (aa)                                                                                                                                        | Protein probability                                                                                          | Number of peptides |
|--------------------------------------------------------|----------------------------------------------------------------------------------------------------------------------------------------------------------------------------------------------------------------------|------------------------------------------------------------------------------------------------------------------------------------------------------|--------------------------------------------------------------------------------------------------------------|--------------------|
| Purified RARP-1 from C600-pTrc-RT0218                  | ALLDVYPILQEK<br><b>SYPVSSSNVTLQK*</b><br>KLVESFIK<br>NNLFELR<br>FISATNNEMYK<br>LTEHATLEQMDMYGYIK<br>LFNHDTNLN <b>N</b> VEK<br>NSTGETLLTAAI <b>N</b> DNYYLAK<br>TAAIYNDNYYLAK<br><b>LFLPDDDIVLGK*</b><br>AAIYNDNYYLAK | 511-522<br>386-398<br>466-473<br>504-510<br>163-173<br>434-450<br>230-242<br>523-543<br>531-543<br>422-433<br>532-543                                | 0.99<br>0.99<br>0.99<br>0.99<br>0.99<br>0.99<br>0.88<br>0.84<br>0.30<br>0.24<br>0.84                         | 11                 |
| Purified RARP-1 from C600-pTrc-RT0216-RT0217-RT0218    | SYPVSSSNVTLQK<br>ALLDVYPILQEK<br>FISATNNEMYK<br>VNNETSELAK<br>KIDNDQIINNQAK<br>SRPNSLALEK<br>LTEHATLEQMDMYGYIK<br>KIDNDQIINNQAK<br>FISATNNEMYK<br>LVESFIK<br>NNLFELR<br>FLVIR<br>EAVLPNDYK<br>ESQQIDPR               | 386-398<br>511-522<br>163-173<br>403-412<br>373-385<br>363-372<br>434-450<br>373-385<br>163-173<br>467-473<br>504-510<br>544-548<br>174-182<br>86-93 | 0.99<br>0.99<br>0.99<br>0.99<br>0.99<br>0.99<br>0.99<br>0.99<br>0.99<br>0.98<br>0.96<br>0.96<br>0.94<br>0.84 | 14                 |
| Concentrated culture supernatant from C600-pTrc-RT0218 | <b>SYPVSSSNVTLQK*</b><br>YDIDINK<br><b>NETQMLFLPDDDIVLGK*</b>                                                                                                                                                        | 386-398<br>474-480<br>417-433                                                                                                                        | 0.99<br>0.70<br>0.85                                                                                         | 3                  |

Deamidated amino acid residues are shown in red.

\*The peptides found both in the culture supernatant and purified protein from the cellular pellets are shown in bold.

## REFERENCES

1. **Biegert, A., and J. Soding. 2008.** De novo identification of highly diverged protein repeats by probabilistic consistency. *Bioinformatics* 24:807-814.
2. **Crooks, G. E., G. Hon, J. M. Chandonia, and S. E. Brenner. 2004.** WebLogo: a sequence logo generator. *Genome Res* 14:1188-1190.
3. **Edgar, R. C. 2004.** MUSCLE: multiple sequence alignment with high accuracy and high throughput. *Nucleic Acids Res* 32:1792-1797.
4. **Gillespie, J. J., A. R. Wattam, S. A. Cammer, J. L. Gabbard, M. P. Shukla, O. Dalay, T. Driscoll, D. Hix, S. P. Mane, C. Mao, E. K. Nordberg, M. Scott, J. R. Schulman, E. E. Snyder, D. E. Sullivan, C. Wang, A. Warren, K. P. Williams, T. Xue, H. S. Yoo, C. Zhang, Y. Zhang, R. Will, R. W. Kenyon, and B. W. Sobral. 2011.** PATRIC: the comprehensive bacterial bioinformatics resource with a focus on human pathogenic species. *Infect Immun* 79:4286-4298.
5. **Koronakis, V., A. Sharff, E. Koronakis, B. Luisi, and C. Hughes. 2000.** Crystal structure of the bacterial membrane protein TolC central to multidrug efflux and protein export. *Nature* 405:914-919.
6. **Mosavi, L. K., T. J. Cammett, D. C. Desrosiers, and Z. Y. Peng. 2004.** The ankyrin repeat as molecular architecture for protein recognition. *Protein Sci* 13:1435-1448.
7. **Petersen, T. N., S. Brunak, G. von Heijne, and H. Nielsen. 2011.** SignalP 4.0: discriminating signal peptides from transmembrane regions. *Nat Methods* 8:785-786.
8. **Rahman, M. S., N. C. Ammerman, K. T. Sears, S. M. Ceraul, and A. F. Azad. 2010.** Functional characterization of a *phospholipase A(2)* homolog from *Rickettsia typhi*. *J Bacteriol* 192:3294-3303.
